# Supplementary material for: Association of vaginal bacterial communities and reproductive outcomes with prophylactic antibiotic exposure in a subfertile population undergoing in vitro fertilization: a prospective exploratory study
Source: PubMed Central journal article supplement — F S Sci. Author manuscript; Available in PMC 2022 Feb 1. (PMC8494411; doi:10.1016/j.xfss.2021.01.002), 2021-01-11
Supplement: NIHMS1743256-supplement-Supp_7.pdf [file NIHMS1743256-supplement-Supp_7.pdf]

Supplemental Figure 7

A

### Estimated Lactobacillus Load

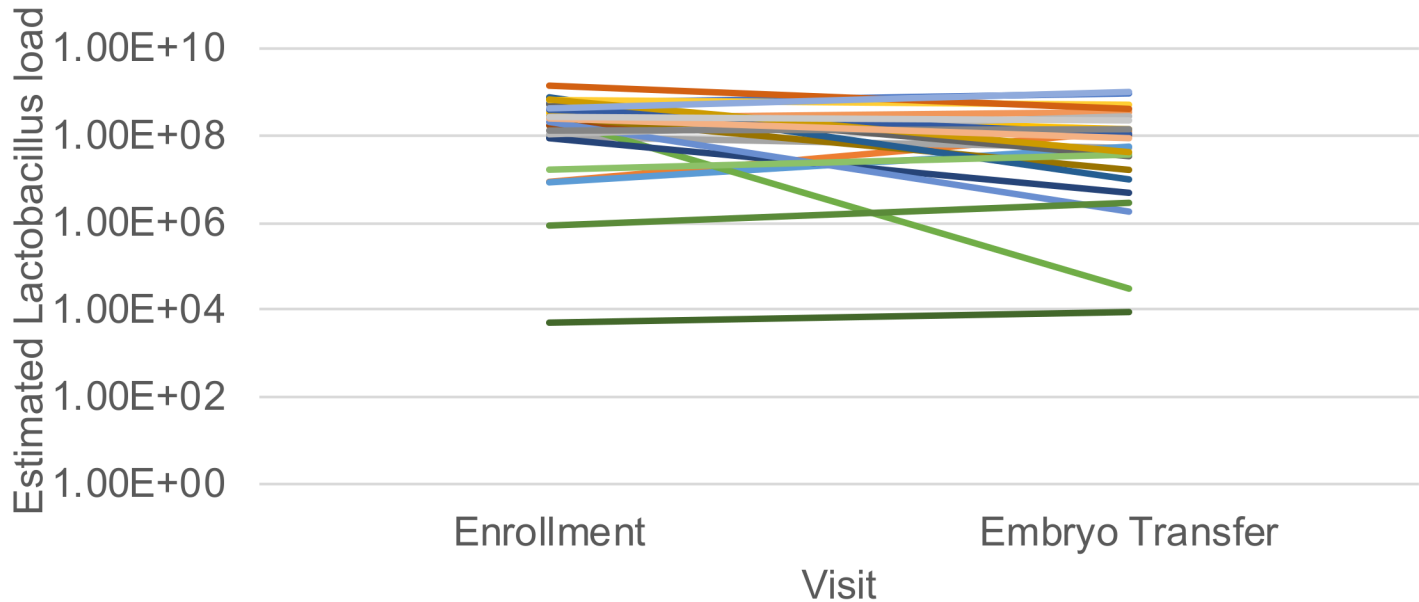

B

### Percent Lactobacillus

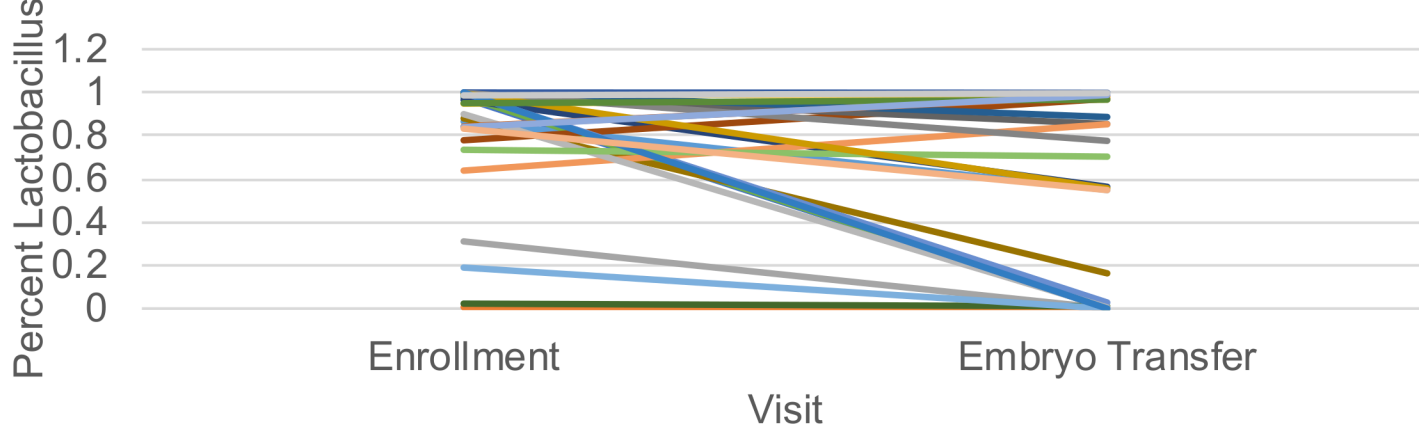

- TWCO-IVF1-1APCRga-lib1
- TWCO-IVF2-2APCRga-lib1
- TWCO-IVF3-3APCRga-lib1
- TWCO-IVF4-4APCRga-lib1
- TWCO-IVF10-10APCRga-lib1
- TWCO-IVF15-15APCRga-lib1
- TWCO-IVF16-16APCRga-lib1
- TWCO-IVF17-17APCRga-lib1
- TWCO-IVF18-18APCRga-lib1
- TWCO-IVF19-19APCRga-lib1
- TWCO-IVF21-21APCRga-lib1
- TWCO-IVF23-23APCRga-lib1
- TWCO-IVF26-26APCRga-lib1
- TWCO-IVF29-29APCRga-lib1
- TWCO-IVF30-30APCRga-lib1
- TWCO-IVF31-31APCRga-lib1
- TWCO-IVF32-32APCRga-lib1
- TWCO-IVF33-33APCRga-lib1
- TWCO-IVF34-34APCRga-lib1
- TWCO-IVF35-35APCRga-lib1
- TWCO-IVF36-36APCRga-lib1
- TWCO-IVF37-37APCRga-lib1
- TWCO-IVF38-38APCRga-lib1
- TWCO-IVF39-39APCRga-lib1
