# Supplementary figures and images for: Association of vaginal bacterial communities and reproductive outcomes with prophylactic antibiotic exposure in a subfertile population undergoing in vitro fertilization: a prospective exploratory study
Source: PubMed Central journal article supplement — F S Sci. Author manuscript; Available in PMC 2022 Feb 1. (PMC8494411; doi:10.1016/j.xfss.2021.01.002), 2021-01-11

# Supplemental Figure 1

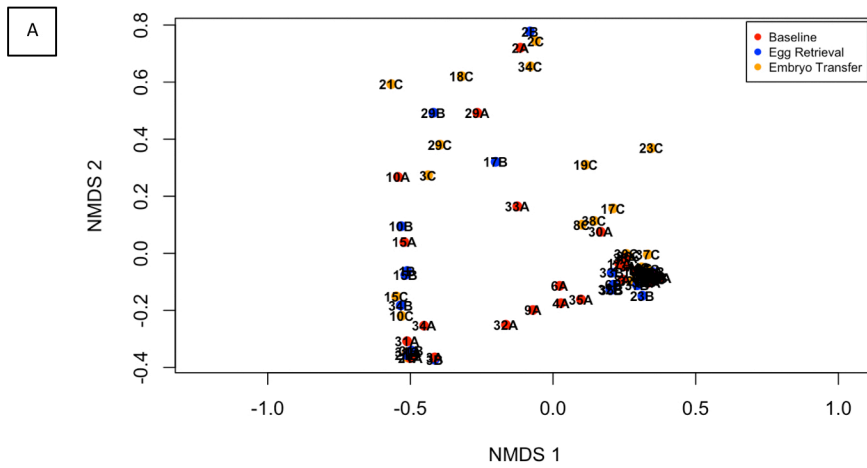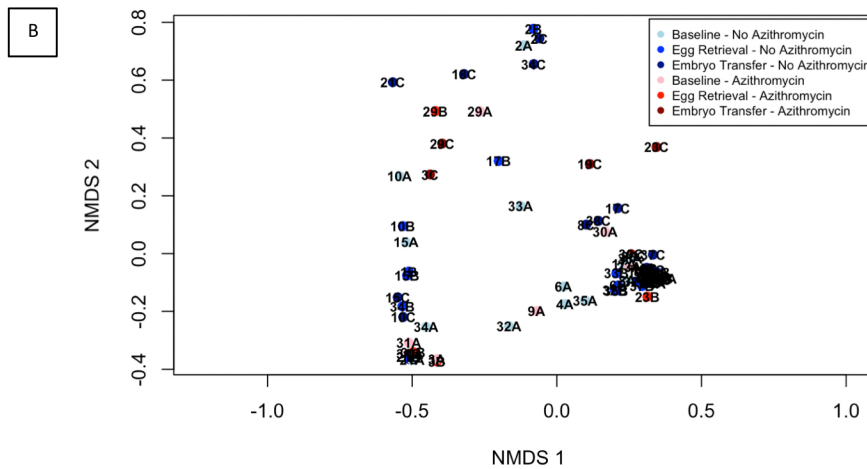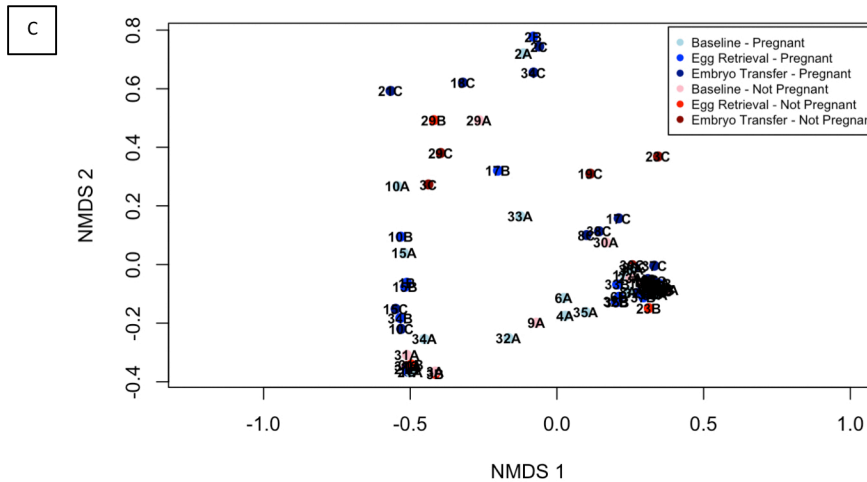

Supplement: NIHMS1743256-supplement-Supp_1.pdf [file NIHMS1743256-supplement-Supp_1.pdf]

# Supplemental Figure 2

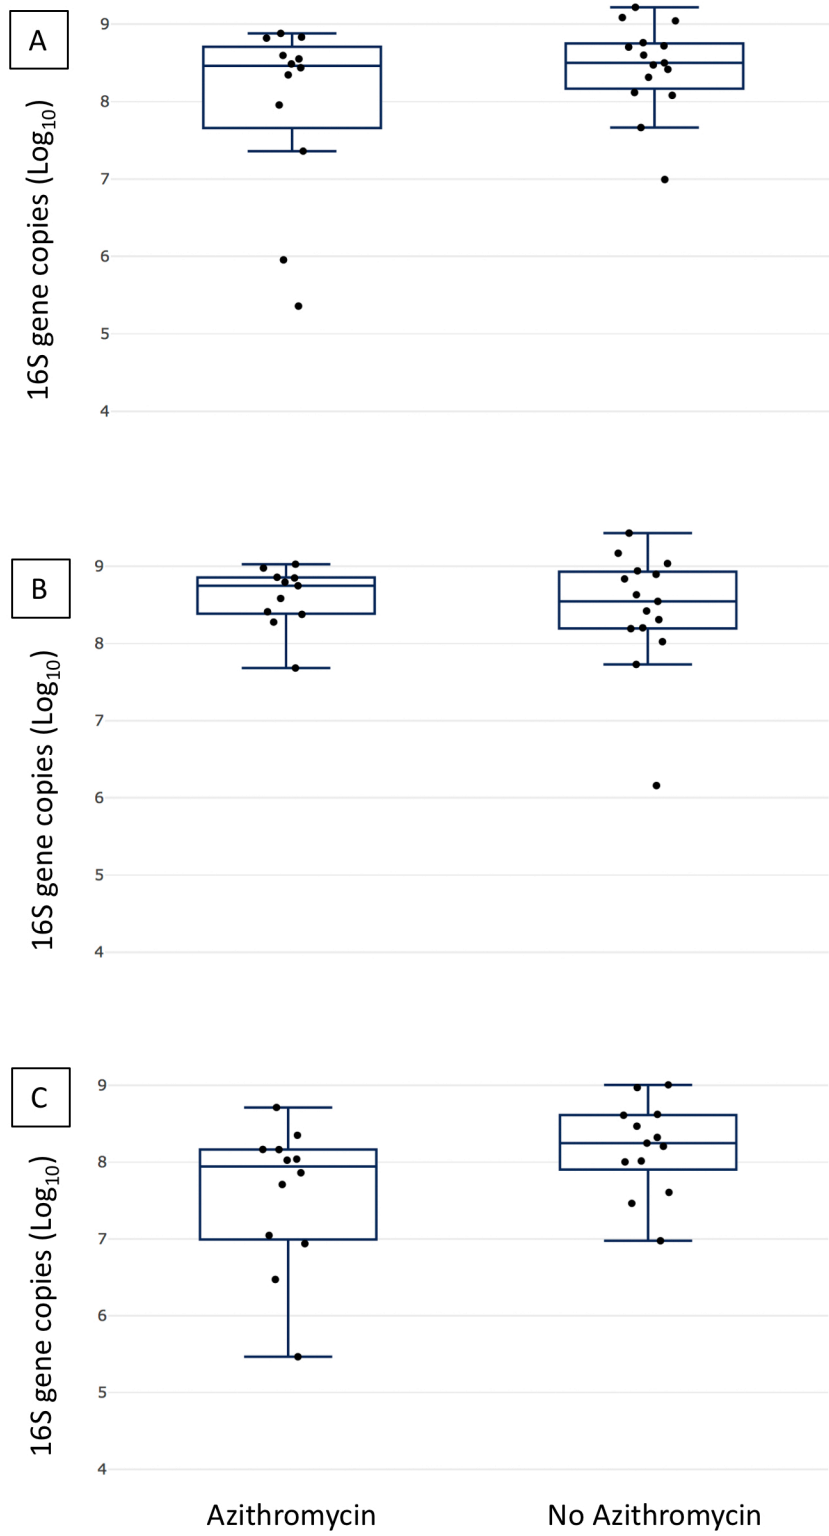

Supplement: NIHMS1743256-supplement-Supp_2.pdf [file NIHMS1743256-supplement-Supp_2.pdf]

# Supplemental Figure 3

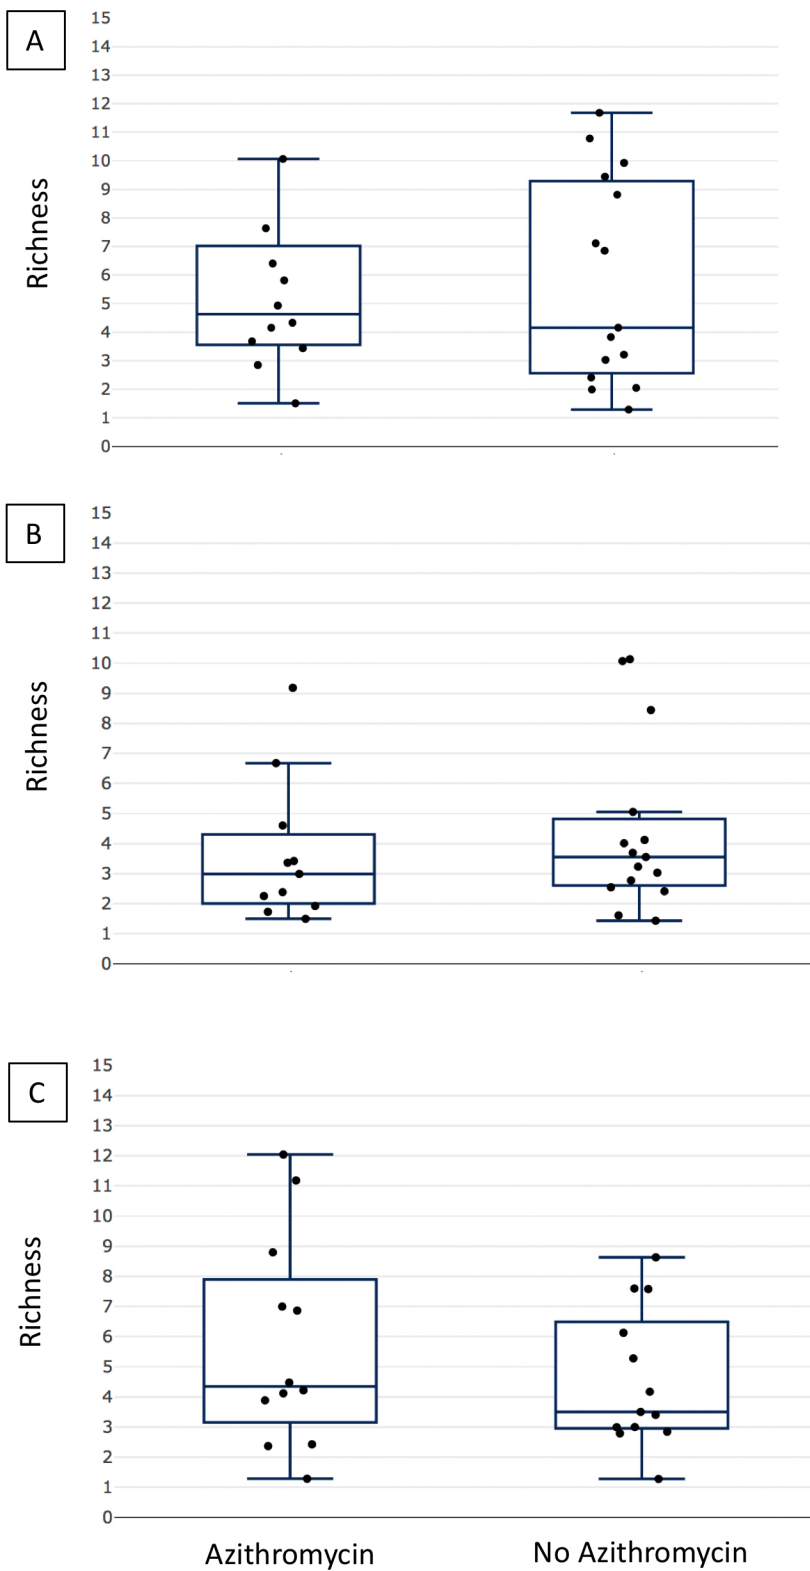

Supplement: NIHMS1743256-supplement-Supp_3.pdf [file NIHMS1743256-supplement-Supp_3.pdf]

Supplemental Figure 4

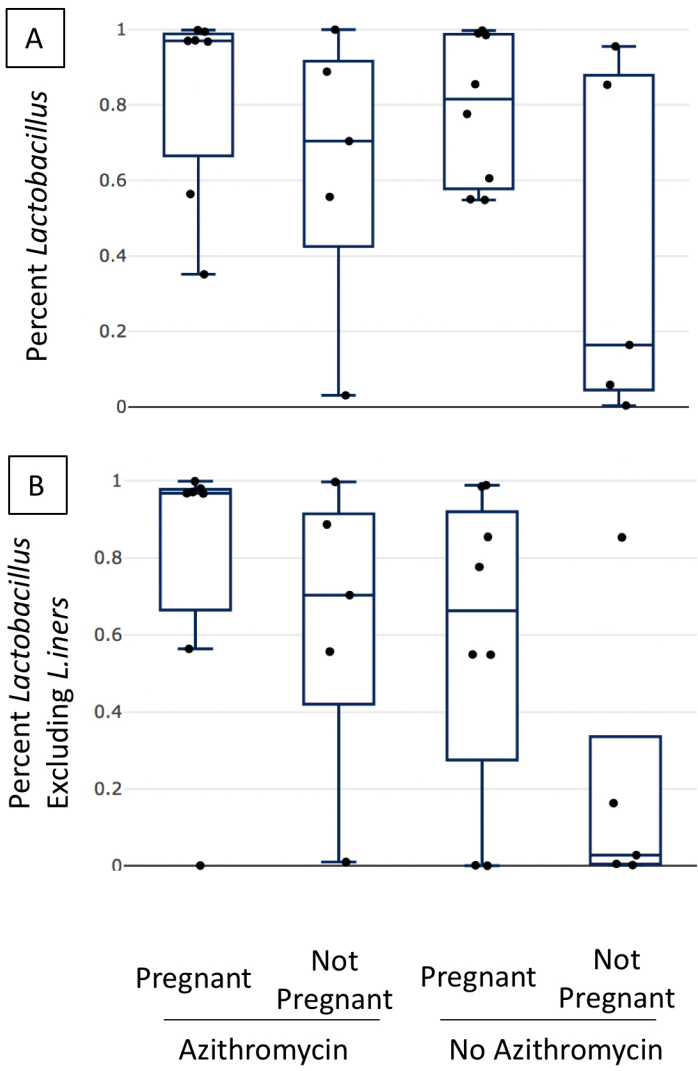

Supplement: NIHMS1743256-supplement-Supp_4.pdf [file NIHMS1743256-supplement-Supp_4.pdf]

# Supplemental Figure 5

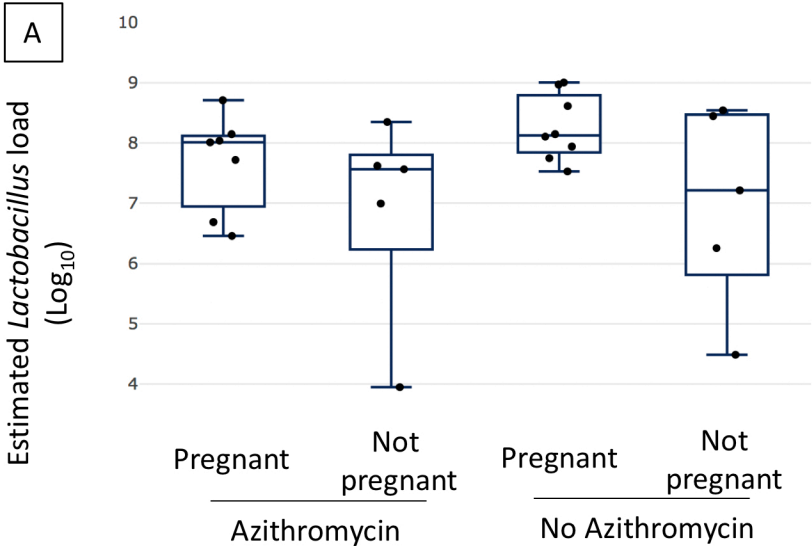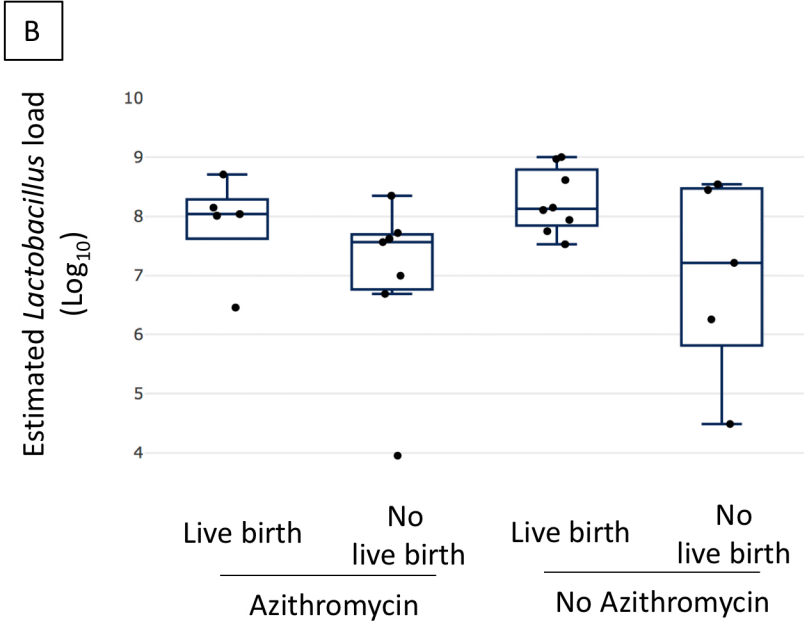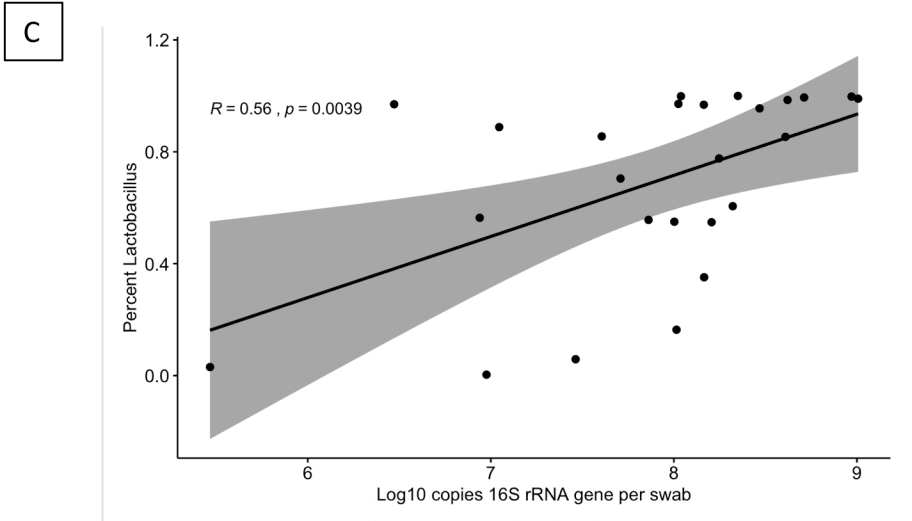

Supplement: NIHMS1743256-supplement-Supp_5.pdf [file NIHMS1743256-supplement-Supp_5.pdf]

# Supplemental Figure 6

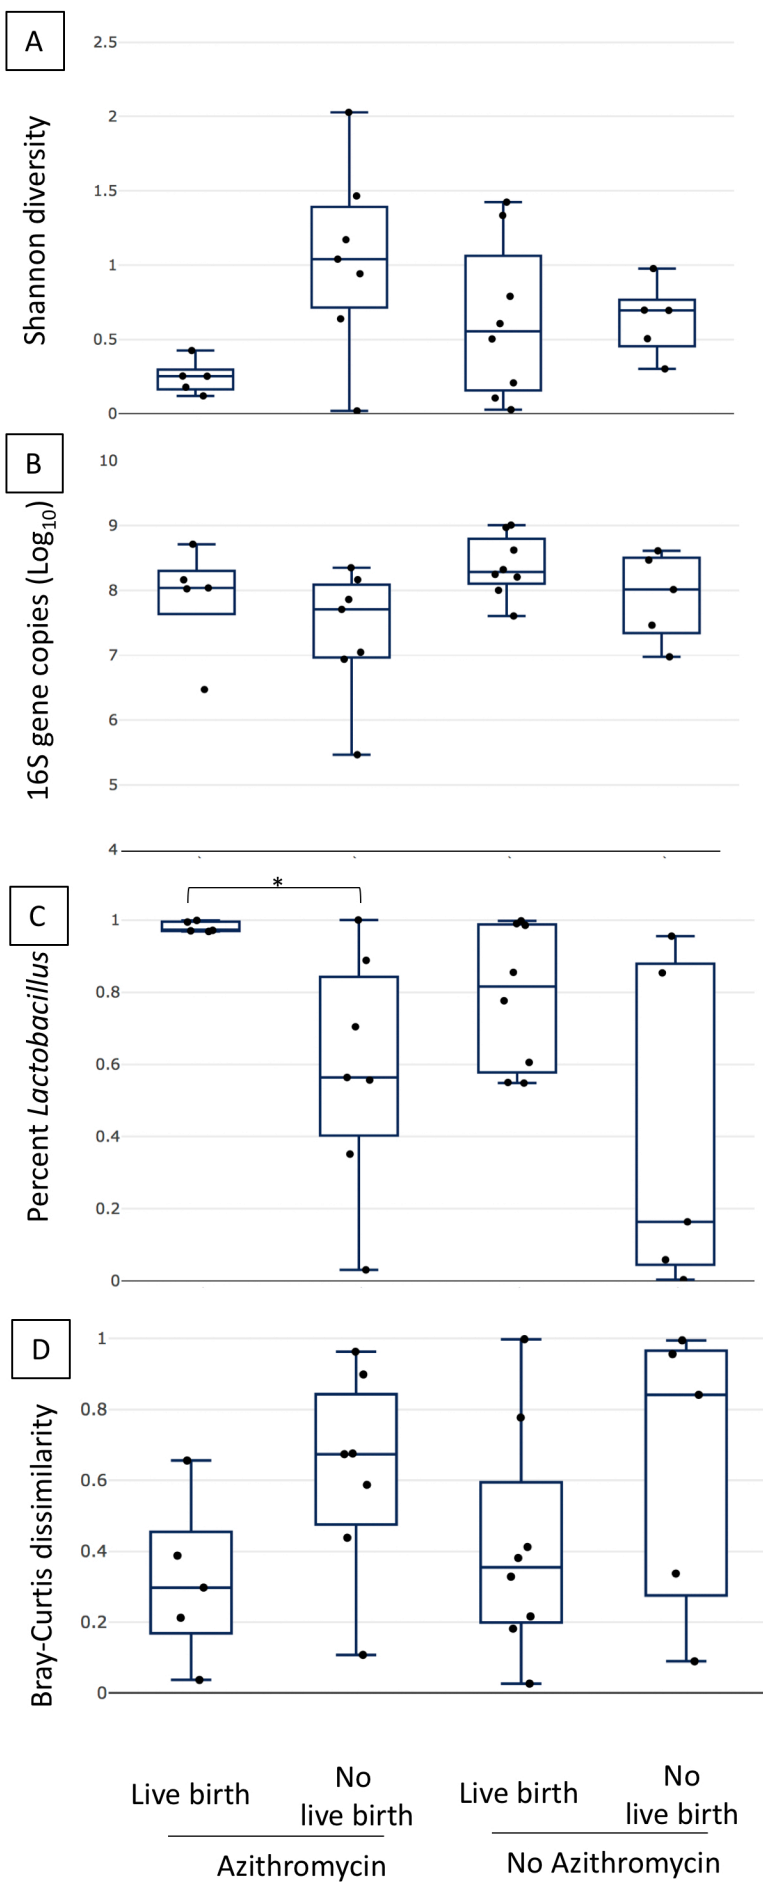

Supplement: NIHMS1743256-supplement-Supp_6.pdf [file NIHMS1743256-supplement-Supp_6.pdf]
